# Supplementary material for: Quartz dissolution associated with magnesium silicate hydrate cement precipitation
Source: Copernicus journal article supplement (doi:10.5194/se-2020-34), 2020-03-31
Supplement: Supplementary file [file se-2020-34-AC2-supplement.pdf]

**Table 1. Composition of till from frost-boil (FER18/15 and 19/15) and nearby M-S-H cemented tillite (FER21/15)**

|                                       | <b>FER18/15</b> | <b>FER19/15</b> | <b>FER21/15</b> |
|---------------------------------------|-----------------|-----------------|-----------------|
| <i>SiO<sub>2</sub></i>                | 87.72           | 89.58           | 72.81           |
| <i>Al<sub>2</sub>O<sub>3</sub></i>    | 4.48            | 4.23            | 4.25            |
| <i>Fe<sub>2</sub>O<sub>3</sub>(T)</i> | 1.54            | 1.42            | 1.01            |
| <i>MnO</i>                            | 0.02            | 0.02            | 0.01            |
| <i>MgO</i>                            | 0.79            | 0.63            | 9.98            |
| <i>CaO</i>                            | 0.26            | 0.30            | 0.24            |
| <i>Na<sub>2</sub>O</i>                | 0.69            | 0.70            | 0.56            |
| <i>K<sub>2</sub>O</i>                 | 2.11            | 1.99            | 1.90            |
| <i>TiO<sub>2</sub></i>                | 0.20            | 0.21            | 0.16            |
| <i>P<sub>2</sub>O<sub>5</sub></i>     | 0.04            | 0.03            | 0.03            |
| <i>LOI</i>                            | 0.70            | 0.52            | 9.40            |
| <i>Total</i>                          | 98.55           | 99.61           | 100.4           |
