# Supplementary material for: Quartz dissolution associated with magnesium silicate hydrate cement precipitation
Source: Copernicus journal article supplement (doi:10.5194/se-2020-34), 2020-03-31
Supplement: Supplementary file [file se-2020-34-RC1-supplement.pdf]

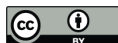

# Quartz dissolution associated with magnesium silicate hydrate cement precipitation

Lisa de Ruiter<sup>1</sup>, Anette Eleonora Gunnæs<sup>2</sup>, Dag Kristian Dysthe<sup>1</sup> & Håkon Austrheim<sup>1</sup>

<sup>1</sup>Physics of Geological Processes (PGP), The Njord Centre, Department of Geosciences and Department of Physics, University of Oslo, PO Box 1048, Blindern, 0136 Oslo, Norway

<sup>2</sup>Centre for Materials Science and Nanotechnology, Department of Physics, University of Oslo, PO Box 1048, Blindern, 0136 Oslo, Norway

Correspondence to: Håkon Austrheim (h.o.austrheim@geo.uio.no)

**Abstract.** Quartz has been replaced by magnesium silicate hydrate cement at the Feragen ultramafic body in south-east Norway. This occurs in deformed and recrystallized quartz grains deposited as glacial till covering part of the ultramafic body. Where the ultramafic body is exposed, weathering leads to high pH (~10), Mg-rich fluids. The dissolution rate of the quartz is about 3 orders of magnitude higher than experimentally derived rate equations suggest under the prevailing conditions. Quartz dissolution and cement precipitation starts at intergranular grain boundaries that act as fluid pathways through the recrystallized quartz. Etch pits are also extensively present at the quartz surfaces as result of preferential dissolution at dislocation sites. Transmission electron microscopy revealed an amorphous silica layer with a thickness of 100-200 nm around weathered quartz grains. We suggest that the amorphous silica is a product of interface-coupled dissolution-precipitation and that the amorphous silica subsequently reacts with the Mg-rich, high pH bulk fluid to precipitate magnesium silicate hydrate cement, allowing for further quartz dissolution and locally a complete replacement of quartz by cement. The cement is the natural equivalent of magnesium silicate hydrate cement (M-S-H), which is currently of interest for nuclear waste encapsulation or for environmentally friendly building cement, but not yet developed for commercial use. This study provides new insights that could potentially contribute in the further development of M-S-H cement.

## 1. Introduction

Weathering at the Earth's surface leads to the breakdown of rocks and the release of chemical compounds to the weathering fluids and is consequently an important process for the chemical cycle of elements and the chemistry of groundwater and soil. The released compounds could also lead to new chemical sediment by the precipitation of secondary minerals. Dissolution rates of silicate minerals have been studied extensively but there is a widely observed discrepancy between field and laboratory measurements. The obtained weathering rates of silicate minerals from field samples can vary by multiple orders of magnitude from experimentally obtained rates, with the latter usually being higher (White et al., 2001; White and Brantley, 2003; Brantley, 2005; Zhu et al., 2006; Moore et al., 2012). This indicates the complexity of dissolution mechanisms in nature as well as the inability to measure dissolution rates under these complex conditions and time scales in the laboratory (Gruber et al., 2014). Hellmann et al. (2012) concluded that chemical weathering of silicate minerals is controlled by nanoscale interfacial



dissolution-precipitation mechanisms and proposed a continuum model for chemical weathering of silicates solely based on dissolution and reprecipitation. The importance of this mechanism is supported by other experimental studies showing the precipitation of amorphous silica on dissolving silicate mineral surfaces (Hellmann et al., 2003; Daval et al., 2011; Ruiz-Agudo et al., 2014; Ruiz-Agudo et al., 2016). The presence of such a layer has also been observed on weathered minerals from field samples (Nugent et al., 1998; Zhu et al., 2006; Velbel and Barker, 2008). The precipitated material could be **amorphous but could also evolve into**, for example, clay minerals. The occurrence of this dissolution-precipitation mechanism in nature could influence the dissolution rate drastically and the increasing number of observations of such layers indicates a widespread occurrence, suggesting that it must be considered in rate laws, dissolution theories and models.

40 Quartz is a silicate mineral known to be very stable at surface conditions and resistant to weathering. Extensive laboratory studies have shown that many variables, e.g. the pH and the presence of alkali cations and organic acids, influence the dissolution of quartz (Brady and Walther, 1990; House and Orr, 1992; Dove and Nix, 1997; Rimstidt, 2015). Despite the known slow dissolution rate of quartz at surface conditions, even at the most favourable conditions, a range of studies performed on karst-like landscapes and caves within sandstone formations has shown that chemical weathering must be  
45 fundamental in the formation of these landforms (Wray and Sauro, 2017). Also, the recent findings of De Ruiter and Austrheim (2018) indicate dissolution of quartz in **natural high pH conditions that is much faster than experimental studies and rate equations predict for the relevant conditions**. ~~This means that, in contrast to the other silicate minerals, quartz dissolution rates obtained from natural field samples are faster than experimentally obtained rates.~~ Coupled dissolution-precipitation has not been considered nor observed for quartz in relation to weathering but might have been overlooked and explain this discrepancy.

50 De Ruiter and Austrheim (2018) discovered and described a chemical sediment that is cemented by a hydrous Mg-silicate ~~cement~~ with the average composition of **Mg<sub>8</sub>Si<sub>8</sub>O<sub>20</sub>(OH)<sub>8</sub>·6H<sub>2</sub>O**, which is a mixture of nanocrystalline Mg-rich phyllosilicates (e.g. kerolite, stevensite and serpentine). The authors suggested that the cement forms from a reaction of quartz with high pH and Mg-rich fluids, which are the result of the dissolution of brucite from the serpentinized bedrock. In this work we investigate quartz that is present within the cemented rock with the aim of understanding the coupling between the  
55 dissolution of quartz and the precipitation of magnesium silicate hydrate cement and the mechanisms that are involved in the process. To achieve this, we use nanoscale observations to obtain insights into the interfacial processes that govern the reaction. **Understanding this cementation process could shed new light on quartz weathering and dissolution-precipitation processes in general.**

The naturally-formed Mg-silicate cement is similar in structure and composition to human-made M-S-H (magnesium silicate  
60 hydrate) cement (Brew and Glasser, 2005; Roosz et al., 2015; Zhang et al., 2018), which is currently of interest as an environmentally friendly alternative to Portland cement due to its **low** carbon footprint (Walling and Provis, 2016) and for the encapsulation of nuclear waste (Zhang et al., 2012). However, M-S-H cement is at a very early stage of development and considerable research is required to be able to **produce** M-S-H on a commercial scale. M-S-H cement is typically produced from reactive but expensive **silica fume**. The natural equivalent described here is formed from widely available natural **quartz**.



65 Understanding the natural formation process may therefore be fundamental knowledge leading to the commercial production of magnesium silicate hydrate cement.

## 2. Geological setting

The cemented rocks were found at the Feragen ultramafic body, about 25 km east of Røros in SE Norway (Fig. 1a). The Feragen ultramafic body consists of dunite and peridotite which is serpentinized to various degrees (Moore and Hultin, 1980).

70 The serpentinized rocks have a weathering rind of about 1-2 cm which is depleted in magnesium due to the dissolution of brucite, while olivine and serpentine appear unaffected by the weathering and are approximately equally abundant inside and outside the rind (Ulven et al., 2017; De Ruiter and Austrheim, 2018). The rocks also contain many fractures providing fluid pathways that enhance the dissolution. Dissolution of brucite releases magnesium and increases the pH of the surface and groundwater in the area. This is an ongoing process that keeps the water alkaline and rich in magnesium continuously (Beinlich and Austrheim, 2012).

75 The area is relatively dry with a mean annual precipitation of 500 mm, but there are small streams and ponds of water, for example inside the ancient chromium mines that are present in the area. The water inside the mines is especially enriched in Mg (up to 89 mg/l) and high in pH (up to 10.6) according to measurements by Beinlich and Austrheim (2012). The area is covered in snow about half of the year, which dilutes the water ~~for a period~~ in spring when it melts. Evaporation rates are relatively high due to dry air and strong wind.

80 The ultramafic body is covered by felsic glacial till, occurring as moraines or as layers of rock fragments on the surface. The till originates from the Weichselian glaciation, the last glaciation occurring in the area, and has a wide variety of sizes, i.e. from sand consisting of single quartz grains to granitic boulders. The material consists mainly of quartz, but K-feldspar and mica are also abundant. The till contains fragments of ultramafic rock, especially around the mine tailings of the abandoned chromium mines. At multiple localities spread over the area, felsic till and ultramafic rock fragments are cemented together and form a solid concrete-like rock due to the precipitation of magnesium silicate hydrate cement (Fig. 1b). As described in detail by De Ruiter and Austrheim (2018), the cemented rocks can be found at localities where the high pH, Mg-rich fluids can accumulate and evaporate such as on terraces formed by frost heave and at the entrances to abandoned chromium mines, where fractured serpentinite allows for extensive high pH, Mg-rich fluids and where the airflow through the mine shafts enhances evaporation (Fig. 1c). Cemented rocks are always limited to the upper 30 cm of the surface, as evaporation is required

85 for the precipitation. The localities with cement are usually less than one m<sup>2</sup> and more than 10 localities have been identified in the area. The end of the Weichselian glaciation at 11.7 ka gives a timeframe for the deposition of the quartz and thus the possible start of dissolution. However, some of the cement is found along the walls of the mine trenches of the chromium mines, indicating that the trench must have been there before the cementation process started. It is furthermore unlikely that the cementation started before the mines were abandoned in the 1920's, as this would influence the mine tailing in which the

95 trench is present and would have made it unlikely that the cement is only present on the outer few cm of the trench.



### 3. Methods

Cemented rock samples from various localities in the area were collected and thin sections were made for microscopic analysis of the reacted quartz. Quartz-rich rock samples from the till without cement were also collected and thin sections were made of inner parts of these rock samples to avoid reacted surfaces and obtain information about the initial quartz. The thin sections were studied by optical microscopy to observe the general microstructure of the samples and deformation features of quartz. In addition, the microstructures were analysed and backscattered electron (BSE) images were obtained by scanning electron microscopy (SEM) using a Hitachi SU5000 FESEM operating with an acceleration voltage of 15 kV. The SEM was equipped with energy-dispersive X-ray spectroscopy (EDX), used for element identification and semi quantitative analysis of the cement and other minerals. The thin sections were coated with carbon before analysis with SEM. Rock samples of about 0.5 cm<sup>3</sup> and coated with gold were studied with the same SEM in secondary electron (SE) mode to observe surface textures and morphologies.

To observe the structures on the nanoscale, electron-transparent thin foils were obtained by focussed ion beam (FIB) preparation using a JEOL-JIB 4500 FIB-SEM. The foils were made from a thin section analysed with SEM at a location where quartz was partly dissolved and replaced by cement. The thin section was coated with gold before the FIB procedure. The electron-transparent samples were analysed with a JEOL JEM-2100F transmission electron microscope (TEM) operating with an acceleration voltage of 200 kV. Both the cement and quartz are known to be beam sensitive so careful handling during the TEM sessions was required. The exposure and focussing of the beam onto the samples was limited as much as possible before images were obtained. This did not allow for higher resolution images than those presented in this work.

### 4. Results

The cemented rocks are composed of felsic rock fragments, containing mainly quartz, K-feldspar and mica, and ultramafic rock fragments, containing mainly serpentine and minor olivine, with cement in between. Aside from the cement, quartz is the most abundant phase and is present as single grains, polycrystalline quartz aggregates or in rock fragments containing besides quartz also feldspar and mica. The weathered quartz grains that are partly dissolved and replaced by the magnesium silicate hydrate cement were studied in detail and the results are listed below together with observations on the non-reacted initial quartz, i.e. the protolith. The other minerals present in the cemented rocks are not specifically addressed in this work.

#### 4.1. Microstructures of initial quartz

Quartz present in non-cemented rock located away from the ultramafic rocks, where it is unlikely that high pH fluid could have affected the quartz and therefore where no cement was found, shows the initial appearance of the quartz. The protolith can also be observed in large quartz fragments inside the cemented rock, which do not show signs of dissolution in the centres. Many quartz fragments are characterized by small equigranular polygonal new grains with straight grain boundaries together with large old grains with undulose extinction and sometimes subgrains (Fig. 2a-b), which is typical for dynamic

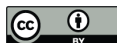

recrystallization (Passchier and Trouw, 2005). This indicates that the quartz has been severely plastically deformed and that dislocation glide and recovery resulted in the formation of subgrains. In addition, essentially all quartz grains, including the dynamically recrystallized grains, show undulose extinction, which indicates that the quartz was plastically deformed by dislocation processes again in a later stage (Passchier and Trouw, 2005).

A range of recrystallization textures are present, indicating subgrain rotation and grain boundary migration and larger granitic fragments in the cemented rock locally have a mylonitic texture. The newly recrystallized quartz grains and subgrains vary in size from 1 to 50  $\mu\text{m}$  (Fig. 2c). The subgrains or recrystallized grains within quartz are clearly visible with TEM as neighbouring grains have a slight change in orientation which can be observed when tilting the sample in bright field mode. In diffraction mode, it can be observed that the zone axes of two neighbouring grains have a difference in orientation around 10-15 degrees. TEM also reveals the presence of many pores and dislocations within the quartz.

## 4.2. Characteristics of weathered quartz

### 4.2.1. Microstructures

Quartz grains embedded within the magnesium silicate hydrate cement often have irregular grain boundaries and the cement is present at fractures and pore spaces within the grains (Fig. 3a). Penetration of the cement into the grains divides one grain into multiple smaller grains as it forms pathways into the grain (Fig. 3a). This texture can be interpreted as the replacement of quartz by cement. Comparing XPL optical micrographs with BSE micrographs of the same grain shows that the cement pathways coincide with (sub)grain boundaries of recrystallized grains. At those locations, the outer boundaries of the recrystallized grains are dissolved and replaced by cement and, therefore, the cement pathways typically have a polygonal shape (Fig. 3a) similar to the initial quartz grain boundaries (Fig. 2b). The original polycrystalline quartz grains are frequently partly or completely disintegrated into single grains, which provides a network of polygonal quartz grains surrounded by magnesium silicate hydrate cement layers of around 5-10  $\mu\text{m}$  (Fig. 3b). This can sometimes be observed at the outer boundary of larger quartz fragments, while the inner part is not infiltrated by cement (Fig. 3b). When the cement has replaced the outer few  $\mu\text{m}$  of the grains, the dissolution is commonly no longer accompanied by cement precipitation, as indicated by the presence of honeycomb-like pore spaces, after the shape of quartz grains, in which sometimes relicts of quartz can be observed (Fig. 3c).

The cement forms a coating around the quartz grains (Fig. 4a-b). Fig. 4a shows that in the initial stages the layer does not cover the whole surface but is rather present as  $\mu\text{m}$ -sized discs on the surface. However, as shown in Fig. 4b, the cement often coats the complete quartz grains with a layer of a few  $\mu\text{m}$  thick, and is also present between two grains as shown in Fig. 4b, which resembles similar situations as Fig. 3a-b. In Fig. 4b, the polygonal shape of the quartz grain coated with cement is clearly visible, showing again that the cement forms around the recrystallized quartz grains. The cement is usually smooth at the interface since it takes over the topography of the quartz surface, resulting in a smooth layer that also fills up etch pits which are common on the surfaces. The cement layer has, however, a flaky texture at the inside (Fig. 4a) and botryoidal textures are



also commonly present on the outer interface of the cement layer (Fig. 4b). It can be observed that the cement is porous due to  
160 the flaky texture.

The dissolution of quartz grains after being surrounded by cement as shown in Fig. 3c is also visible in Fig. 4c, where a large  
void is present between the cement coating and the quartz grain, meaning that it reduced in size due to dissolution after the  
cement has been precipitated. It also indicates that quartz dissolution is not always accompanied by cement precipitation.  
Empty honeycombs shown in Fig. 4d and 3c indicate the complete dissolution of multiple quartz grains that were surrounded  
165 by cement, leading to empty honeycombs and a grid of cement along the previous grain boundaries. A void between quartz  
and cement can typically only be observed when the cement layer has a thickness of a least 5  $\mu\text{m}$ , although it should be noted  
that much larger areas of cement occur within the rocks without such large pore spaces. Various stages of the dissolution and  
replacement process can be observed within one thin section and even within one quartz grain. For example, the outer part of  
a quartz grain may already be converted into the empty honeycombs while at the inner part only the grain boundaries are partly  
170 replaced by cement (Fig. 3c). The honeycomb pore spaces can be up to 50  $\mu\text{m}$  in diameter, corresponding to the size of the  
recrystallized grains and subgrains and indicate the amount of quartz dissolved in total since the start of the process. Lastly,  
quartz that is almost completely replaced by cement is present within the cemented rocks, in which case the honeycomb pore  
spaces are filled with magnesium silicate hydrate cement (Fig. 5). This can be observed since the outlines of the original quartz  
grains have a slightly different contrast in BSE images, indicating a different density, even though the complete grains have  
175 been replaced by cement (Fig. 5).

#### 4.2.2. Morphology

SE images of bulk samples of cemented rock show that etch pits are abundant on the surfaces of the quartz grains that are  
surrounded by magnesium silicate hydrate cement (Fig. 6). Both rectangular (Fig. 6b) and triangular etch pits (Fig. 6d) occur  
on different surfaces. The rectangular pits vary in size from 0.1 to 4  $\mu\text{m}$  and smaller pits sometimes occur within larger ones.  
180 The triangular pits vary from 0.1 to 2  $\mu\text{m}$ . Most etch pits have steep edges and the deeper pits often have a step or spiral  
structure. The etch pits on one surface always have the same orientation and are sometimes aligned as can be observed in Fig.  
6b and d. The density of the etch pits varies per grain but for example in Fig. 6b the etch pits density is  $10^{10} \text{ cm}^{-2}$  with the  
reacted surface being larger than the non-reacted surface. Etch pits do not occur on every quartz grain, as for example the grain  
in Fig. 4c does not have etch pits even though dissolution has clearly taken place.

#### 185 4.2.3. Nanostructures

Transmission electron microscopy of a quartz grain that is partly dissolved and surrounded by cement (Fig. 7a-b), shows that  
an amorphous silica layer of 100-200 nm is present at the interface (Fig. 7c). The amorphous layer occurs at all the outer  
boundaries of quartz present in the FIB foil. Different fragments of quartz grains are held together by the magnesium silicate  
hydrate in the studied sample, but there is often a void of 100-200 nm between the amorphous layer and the cement (see the  
190 bright areas in the Fig. 7c). With TEM it can be observed that the magnesium silicate hydrate cement has a fibrous structure



and that these fibres of the cement are attached to and partly intergrown with the amorphous layer. This makes the interface between the amorphous silica layer and the cement irregular. Quartz and the amorphous silica can easily be distinguished with TEM from the lack of crystalline diffraction pattern or contrast compared to the crystalline quartz. EDX indicates that the layer has the same Si to O ratio as the quartz grain but whether the layer is hydrated or not is unclear. At internal grain boundaries within the quartz, there is also often a layer of amorphous material present with a thickness of 30 nm (Fig. 7d). Based on the EDX data and diffraction, the layer is also amorphous silica and similar in composition to the amorphous layer at the outer interface of the quartz. As shown in Fig. 7d, the thin amorphous layer continues from the thicker amorphous layer at the outer interface and follows the grain boundary inwards for about 1.4  $\mu\text{m}$ . At other grain boundaries, the amorphous layer can be found further inwards but there are also grain boundaries that do not have any visible amorphous layer, especially further into the quartz.

## 5. Discussion

### 5.1. Quartz dissolution and the role of grain boundaries

We observed that quartz grains with a diameter of 50  $\mu\text{m}$  within the cemented rocks are completely dissolved and (partly) replaced by magnesium silicate hydrate cement at surface conditions in a subarctic climate. Some of these cemented rocks occur in the mine tailings of mines that were active until about 100 years ago, indicating that the grains dissolved in less than 100 years. At the Feragen ultramafic body, meteoric water has a high pH and is rich in  $\text{Mg}^{2+}$  due to the chemical weathering of ultramafic rock which is associated with the dissolution of brucite. This is clearly visible by the weathering rind which lacks brucite in contrast with the inner part of the rocks (Beinlich and Austrheim, 2012; Ulven et al., 2017), while olivine and serpentine appear unaffected. The ultramafic body of Feragen crops out over about 14  $\text{km}^2$  and represents a large reservoir of brucite. The dissolution of brucite in the outer rims of the ultramafic rocks is a fast process (Pokrovsky and Schott, 2004; Hövelmann et al., 2012), and thus the surface water will usually be in, or close to, equilibrium with brucite, meaning the pH will be above 10.

With increasing pH the solubility and dissolution rate of quartz increases rapidly, especially above a pH of 10 (Brady and Walther, 1990; House and Orr, 1992). Based on the rate equation of Rimstidt (2015) and assuming a continuous contact with a solution of pH 10.6 and a  $\text{Na}^+$  concentration of  $1.3 \cdot 10^{-4} \text{ mol/l}$ , the highest measured values in the area (Beinlich and Austrheim, 2012), and a temperature of 1  $^\circ\text{C}$ , the mean annual temperature (Norwegian Meteorological Institute), the dissolution flux of quartz in the area should be  $2.8 \cdot 10^{-13} \text{ mol/m}^2 \text{ s}$ . However, a quartz grain with a diameter of 50  $\mu\text{m}$  dissolving in 100 years, as is the case in the area, indicates a dissolution flux of  $3.5 \cdot 10^{-10} \text{ mol/m}^2 \text{ s}$  (using equations of Lasaga, 1984). Meaning that the dissolution rate is 3 orders of magnitude higher than predicted by the established rate equation that is based on multiple experimental studies. The parameters used in the rate equation are the highest measured and thus most favourable  $\text{Na}^+$  concentration and pH values, while using the average measured pH (9.8) and the  $\text{Na}^+$  concentration ( $3.9 \cdot 10^{-5} \text{ mol/l}$ ), the suggested rate is  $8.5 \cdot 10^{-14} \text{ mol/m}^2 \text{ s}$  and the difference is thus another order of magnitude larger. The cemented



rocks found away from the mines could not have started to form before the end of the Weichselian Glaciation (11.7 ka). A quartz grain of 50  $\mu\text{m}$  that has been completely dissolved during this time span would nevertheless still indicate a rate faster than predicted by the rate equation:  $3.0 \cdot 10^{-12} \text{ mol/m}^2 \text{ s}$ . This discrepancy is in contrast to the typically observed difference in dissolution rates of silicate minerals between field data and experimental data, where the latter usually suggests higher rates (White and Brantley, 2003; Brantley, 2005).

At high pH conditions, aqueous silica and  $\text{Mg}^{2+}$  are known to precipitate together from surface water to form Mg-silicate phases (Tosca and Masterson, 2014). Hence, the cement, a hydrous Mg-silicate, precipitates on the grain boundaries where quartz has been dissolved and forms a layer that surrounds the quartz grains. That the dissolution of quartz proceeds faster in our natural case than predicted by experiments, might be related to the coupling between the dissolution and the precipitation of a new phase at the surface of the quartz. The new phase, the cement, forms within the interfacial fluid after quartz dissolution and acts as a sink for dissolved silica, which subsequently enhances the further dissolution of quartz (Anderson et al., 1998a,b; Schaefer, 2018).

The dissolution and replacement of polycrystalline quartz grains many times larger than 50  $\mu\text{m}$  can occur within the same time span since the dissolution starts at the internal grain boundaries or subgrain boundaries which are present due to deformation and recrystallization at an earlier stage (Fig. 2b). This indicates that fluids penetrate polycrystalline grains along the grain boundaries (Jonas et al., 2014). This is likely to be accomplished by intergranular diffusion via fluid films between the grains (Renard and Ortoleva, 1997; De Meer et al., 2005). The combination of dissolution on the surfaces of the grains and diffusion via intergranular fluids has been proposed as the main mechanism for the chemical weathering of quartzite and sandstone (Piccini and Mecchia, 2009; Wray and Sauro, 2017). In quartz-rich rock, the intergranular fluids will be rich in  $\text{H}_4\text{SiO}_4$  (silicic acid), the main form of dissolved silica in nature (Iler, 1979). Since the concentration of silicic acid in the meteoric water outside the rock or in larger fractures within the rock is much lower, the silicic acid will diffuse from the intergranular space to the fractures and larger pore spaces where the meteoric water is present (Piccini and Mecchia, 2009). This favours diffusion of silica away from the intergranular fluids and enhances the dissolution of quartz at the intergranular surfaces within the rock. Thus, the microstructure of the quartz protolith is also likely to contribute to the dissolution rate. Owing to the deformation and subsequent dynamic recrystallization, the surface area is significantly increased and hence the total amount of dissolved quartz can be much higher than for non-recrystallized quartz. As shown in Fig. 3a the cement first forms at the grain boundaries and in Fig. 3b that this leads to the disintegration of recrystallized polycrystalline quartz grains of multiple mm in diameter to single quartz grains between 1 and 50  $\mu\text{m}$ , the size of the recrystallized grains (Fig. 2c), which are sometimes dissolved completely (Fig. 3c). Fractures and inclusions are also starting points of cement precipitation.

## 5.2. Etch pits

Triangular and rectangular etch pits are abundant on quartz within the cement (Fig. 6) and are related to the rhombohedral and the prismatic surfaces of quartz crystals respectively (Yanina et al., 2006). A relationship between the location where dislocations intersect with the mineral surface and the nucleation of etch pits on quartz has been widely reported (Blum et al.,





1990; Gratz et al., 1991; Yanina et al., 2006). Many of the quartz grains within the cemented rock show undulose extinction, including the recrystallized grains, indicating the presence of dislocations (Fig. 2a). The initial non-cemented quartz grains show the same features, indicating that crystal plastic deformation occurred before the cementation and is **not related to the cementation process**. The deformation could partly be induced by the glaciation due to subglacial shearing, which is common for sediments below glaciers (Boulton et al., 2001; Evans et al., 2006).

Although an increased dislocation density increases the number of the etch pits during dissolution, it is not clear whether this influences the bulk dissolution rate. Multiple studies concluded that the influence of dislocations on the total dissolution rate of quartz is insignificant (Blum et al., 1990; Gautier et al, 2001; Lasaga and Luttge 2001). However, experiments **did show a relation** between the pH and the number of etch pits, indicating that most etch pits form when the pH, and thus the dissolution rate, was highest (Knauss and Wolery, 1988). Brantley et al. (1986) showed that if the silica concentration is far below a critical concentration, etch pits grow rapidly, while at a higher concentration dissolution occurs without etch pits. The high abundance of etch pits on the quartz surface of grains in the cement thus indicates far out of equilibrium dissolution and a high dissolution rate. The aligned etch pits in Fig. 6b and d might represent deformation bands or subgrain boundaries, since these are characterized by the concentration of dislocations.

### 270 **5.3. Amorphous silica layers**

The amorphous silica layer present between the quartz and cement (Fig. 7c) must be related to the dissolution process since it occurs at the outer boundary of quartz grains that are partly dissolved during ~~the cementation process~~ (Fig. 7a). The formation of an amorphous silica layer as result of dissolution has been reported for other silicate minerals in multiple experimental studies (Casey et al., 1993; Hellmann et al., 2003; Daval et al., 2011; Ruiz-Agudo et al., 2012), as well for natural rock samples (Nugent et al., 1998; Zhu et al., 2006). The mechanisms that form this layer and the influence they have on the dissolution rate of silicate minerals is a matter of debate. Most recent experimental studies ~~do however~~ indicate that the layers form due to an interface-coupled dissolution-precipitation process (Hellmann et al., 2012; Ruiz-Agudo et al., 2012; Ruiz-Agudo et al., 2016). These studies show that the layer forms because the fluid layer at the interface becomes saturated with silica upon dissolution of the silicate surface, even though the bulk fluid is far undersaturated, so that amorphous silica subsequently precipitates at the interface. Studies have indicated the co-occurrence of dissolution through etch pit formation and amorphous material precipitation (Jordan et al., 1999; Ruiz-Agudo et al., 2012), similar to the observations on quartz interfaces in this study. It is however not shown before that this mechanism is also involved in quartz dissolution, although the growing amount of literature on such surface altered layers suggests that they are widely occurring on various silicate minerals. Moreover, Pope (1995) discovered amorphous silica layers on weathered quartz from moraine soils and also observed these layers at internal grain boundaries and along fractures. Geochemical calculation performed with PHREEQC (Parkhurst and Apello, 1999) indicate however that if quartz dissolves in a high pH solution, the solution will remain undersaturated with respect to amorphous silica (see supplementary material). Quartz dissolution by itself can thus probably not supersaturate the solution with respect to amorphous silica. External factors that could supersaturate the interfacial fluid **such as evaporation** must therefore play a role.



290 This is also suggested ~~by the fact~~ that the cement is limited to the surface, where evaporation takes place. The supersaturation thus seems to be generated by a combination of quartz dissolution and evaporation, resulting in the precipitation of amorphous silica.

It is well known from experiments that amorphous silica and brucite will react to magnesium silicate hydrate cement (Zhang et al., 2012) and the geochemical calculations (see supplementary material) also show that if quartz or amorphous silica dissolves in a solution that is in equilibrium with brucite, the solution will be supersaturated with respect to multiple Mg-silicate phases. It is thus likely that in our natural case, the amorphous silica is incorporated into the magnesium silicate hydrate cement under Mg-rich and high pH conditions. Whether the amorphous silica is directly incorporated in the cement or dissolves first is unclear, although experiments have shown that the formation of Mg-silicates often involves poorly crystallized, or gel-like, precursors or intermediate phases (Steeffel and Van Cappellen, 1990; Baldermann et al., 2018), which transform into more crystalline phases due to progressive dehydration which involves the loss of weakly bonded surface water (Tosca and Masterson, 2014). Such dehydration processes might be the result of evaporation. It is unclear why amorphous silica precipitates first, and magnesium silicate hydrate does not precipitate directly. This could possibly be related to the low nucleation barrier of amorphous silica making it more favourable to precipitate amorphous silica on the interface rather than magnesium silicate hydrate or the different thermodynamic properties that the fluid boundary layer has compared to the bulk fluid. Since the cement is porous and nanocrystalline, diffusion can continue once a layer has built around the quartz grains (Fig. 4b), making it possible for quartz to continue to dissolve and for the cement layer to become thicker (Fig. 4c-d). This could also be accommodated by fluid moving through the small void between the cement and the quartz (Fig. 7c).

Amorphous layer precipitation is usually thought of as slowing down or ceasing dissolution, since it covers the reactive surface (Daval et al., 2011). However, the reaction of amorphous silica to porous magnesium silicate hydrate exposes the surface again and could thus lead to more dissolution and subsequent amorphous silica precipitation, creating a continuous cycle of dissolution and precipitation (Ruiz-Agudo et al., 2012). Another possibility is that the amorphous layer dissolves at the outer boundary while quartz dissolves and reprecipitates as amorphous silica at the inner boundary due to the presence of a fluid layer between the quartz and the amorphous layer (Hellmann et al., 2012). Both theories would result in the continuous dissolution of quartz regardless of the amorphous silica precipitation.

315 The intergranular thinner amorphous layers again indicate the infiltration of the reactive fluids and the start of dissolution at the grain boundaries (Fig. 7d). Although the observations of intergranular amorphous layers are limited since they can only be observed with TEM, it is likely that they will develop into cement layers as in Fig. 3a. The possibility of infiltration will accelerate the replacement reaction from quartz to cement and these findings emphasize the importance of preconditioning the quartz by deformation to provide intergranular fluid pathways.



#### 320 5.4. Mass transport and cement precipitation

When the cement layer around a quartz grain has reached a thickness of about 5  $\mu\text{m}$ , the quartz often continues to dissolve while the cement precipitation ceases, which leads to honeycomb textures as could be observed in Fig. 4c. The formation of the honeycomb texture is remarkably similar to the formation of cavities in experimentally produced magnesium silicate hydrate cement that is made with silica fume particles, where the cement precipitates on the surface of these particles after  
325 which the particles dissolve and no cement fills the gap (Zhang et al., 2018).

Ruiz-Agudo et al. (2016) suggested that whether amorphous silica will precipitate as result of dissolution of silicate minerals depends on the ratio between reactive surface area and mass transport, since the dissolution rate needs to be fast compared to the diffusion of dissolved ions to the bulk solution to create a saturated fluid layer. This suggests that a low flow rate is required for the precipitation of amorphous silica and hence for subsequent precipitation of cement. The lack of cement precipitation  
330 inside the honeycombs might therefore be related to a high flow rate and diffusion due to larger pore spaces and indicates the release and transport of silica instead of the precipitation of amorphous silica. At confined spaces like grain boundaries, transport of silica away from the dissolving surface is limited and amorphous silica can precipitate and thus cement can form. However, if quartz is replaced by porous cement the permeability increases. This might enhance the flow rate and the transport of silica and magnesium so that the cement no longer can precipitate (Fig. 4c). In some cases when several neighbouring grains  
335 dissolve simultaneously, local supersaturation with respect to the cement phase is maintained, and the cement continues to precipitate as the entire quartz grain dissolves, leading to complete replacement (Fig. 5).

Disruptions at the quartz-cement interface might also lead to enhanced fluid transport. Observations similar to the cement honeycombs have been made for pyroxene and amphibole that has been weathered to clay minerals (Proust et al., 2006; Velbel and Barker, 2008). Velbel and Barker (2008) described the continuous dissolution of pyroxene after the outer layer has been  
340 transformed to smectite and ascribed this to mechanical disruption at the smectite-pyroxene interface due to hydration episodes that lead to tensional forces. A rupture between the smectite and the pyroxene subsequently improves the fluid access and thus mass transport and dissolution of the pyroxene is favoured. From De Ruiter and Austrheim (2018) it is known that the magnesium silicate hydrate cement phase is related to the clay minerals kerolite and stevensite, the latter being a Mg-smectite that is known to shrink and swell with hydration cycles. In addition to the hydration cycles, freeze and thaw cycles could play  
345 a role in the disruption at the cement-quartz interface. Besides changes in fluid flow, chemical changes in pore fluids might also play a role in the formation of the honeycomb pore spaces. The geochemical calculations show that the pH of the solution will decrease with the continuation of quartz dissolution (see supplementary material). This would locally increase the solubility of the cement in the cavities between the cement and quartz and its precipitation might therefore slow down or ceases.

350 The precipitation of cement between different rock fragments instead of directly around quartz could be accomplished by the transported silica, leading to the cementation of the rock fragments and grains and hence the formation of a solid rock. This cement likely precipitates from solution upon evaporation, as is indicated by the fact that cementation is limited to the surface,



355 which is comparable to the formation of other Mg-silicate phases (Tosca and Masterson, 2014). The  $Mg^{2+}$  is present in the meteoric fluid due to weathering of brucite but must be transported through surface or groundwater before precipitating as cement, during which part of it is lost in the discharge of water. Hence, it is difficult to make a mass balance based on the observations. Furthermore, other minerals might contribute to the Si and Mg concentration in solution. For example, feldspar is also replaced by cement (De Ruiter and Austrheim, 2018).

360 Taking all the observations into account we propose that the dissolution of quartz and the precipitation of cement occurs through the following steps: (1) the bulk fluid has a high pH and is rich in  $Mg^{2+}$  due to brucite dissolution; (2) quartz dissolves (through etch pits) due to far out of equilibrium conditions; (3) the interfacial fluid layer at the quartz surface gets saturated due to quartz dissolution and evaporation and amorphous silica precipitates; (4) the amorphous layer reacts with the high pH, Mg-rich fluids to form magnesium silicate hydrate cement; (5) the fluid can still access the quartz surface since the cement is porous, so the process of quartz dissolution, amorphous silica precipitation and subsequent cement precipitation will continue; (6) changes in fluid flow rates and/or fluid chemistry could lead to the ceasing of cement precipitation and therefore the formation of honeycomb textures; (7) diffused silica and dissolved brucite can co-precipitate as cement at some locations away from the quartz surfaces, leading to cementation of the rock fragments. Recrystallization before this process has preconditioned the quartz by providing grain boundaries which can act as fluid pathways with confined conditions. These are the ideal conditions for the replacement process, leading to the relatively fast replacement of the intergranular grain boundaries of quartz by cement.

370 Another relevant and widely observed phenomenon associated with pressure solution that might play a role is the enhancement of quartz dissolution in the presence of mica or clay minerals like smectite (Hickman and Evans, 1995; Bjørkum, 1996; Schwarz and Stöckhert, 1996; Fisher et al., 2000). The reason for this phenomenon is still unclear, although multiple recent experimental studies suggested that electrochemical surface potentials play a key role and are more important than pressure itself (Meyer et al., 2006; Greene et al., 2009; Kristiansen et al., 2011), and therefore that it is a chemical rather than a mechanical process. This would mean that no significant pressures are required, and that pressure is only needed to keep the surfaces in close proximity, since the diffuse electric double layers, which are on the nm-scale, of both surfaces must overlap. As shown by Kristiansen et al. (2011), an opposing surface with a more negatively charged surface potential than quartz will increase the dissolution rate of quartz, and moreover, the surface potential of mica decreases rapidly with increasing pH, leading to a much lower surface potential for mica than for quartz at a pH around 10. Mica is a representative 2:1 phyllosilicate mineral, so it is likely that other phyllosilicate minerals have similar values. The exact amount of pressure needed or involved in the dissolution is nevertheless unclear and it therefore remains speculation whether the magnesium silica hydrate cement, which is a 2:1 phyllosilicate (Roosz et al., 2015; De Ruiter and Austrheim, 2018), will enhance the dissolution of quartz at ambient conditions by precipitating on the quartz surface and having a more negative electrochemical surface potential than quartz.



## 385 **5.5 Relevance for synthetic magnesium silicate hydrate cement**

The natural magnesium silicate hydrate cement is similar, both compositionally and structurally, to synthetic M-S-H cement (De Ruiter and Austrheim, 2018), and it is therefore reasonable to ask what we can learn from nature in our attempts to develop M-S-H cement for commercial use. M-S-H cement has been suggested as a low CO<sub>2</sub> cement that could replace Portland cement (Imbabi et al., 2012), although it is currently mainly of interest as a cement for the encapsulation of nuclear waste due  
390 to its pH being lower (9-10) than that of conventional Portland cement (>12) (Zhang et al., 2011; Zhang et al., 2012). This is beneficial for the storage of for example Al-containing nuclear waste, which causes corrosion problems and the dangerous release of hydrogen gas when encapsulated in Portland cement (Zhang et al., 2012).

Human-made M-S-H cement is produced from a reactive Si-source like silica fume, which is amorphous silica consisting of spherical particles of about 150 nm in diameter. It is an expensive material even though it is an industrial by-product. The  
395 natural example shows that M-S-H forms from  $\mu\text{m}$ -sized quartz grains that are preconditioned by deformation and recrystallization. Quartz mylonite is abundant in nature and further testing may show if such quartz can compete with silica fume. A porous honeycomb textured cement, as formed in nature, might be interesting in specific applications since honeycomb structures in general are known as relatively light but strong structures. The high pH fluids needed to form the natural M-S-H are formed by dissolution of brucite during weathering of serpentinized peridotite. Brucite is typically  
400 intergrown with serpentine and difficult to separate, although weathering processes effectively dissolve brucite and provide us with the high pH, Mg-rich fluid.

The natural cement forms in a century and is a fast process on a geological time scale. However, to make this process relevant to the cement industry the process must be accelerated. Further research has to focus on this aspect and look for possible catalysers. More research is furthermore needed to analyse the long-term durability of this material, although mechanical tests  
405 on M-S-H cement are promising as they show that the compressive strength can exceed conventional Portland cement and can be influenced by for example the Mg to Si ratio (Zhang et al., 2012; Jin and Al-Tabbaa, 2014).

## **6. Conclusions**

Quartz dissolution in the weathering zone of an ultramafic complex can lead to the precipitation of magnesium silicate hydrate cement through interface-coupled dissolution-precipitation. The process involves the formation of a nm-scaled layer of  
410 amorphous silica which acts as a precursor for the magnesium silicate hydrate phase. High pH (~10), Mg-rich fluids resulting from weathering of ultramafic rocks initiate the replacement process. The rate of quartz dissolution is about 3 orders of magnitude higher than experimentally derived rate equations suggest under the prevailing high pH conditions. This discrepancy is likely caused by the precipitation of the cement within the interfacial fluids subsequent to quartz dissolution as this acts as a sink for the dissolved material and therefore enhances dissolution. Preconditioning of the quartz by deformation further  
415 enhances the replacement process as it provides intergranular grain boundaries that could act as fluid pathways and therefore as starting points for the dissolution of quartz and precipitation of cement.



### Data and sample availability

Data is available upon request.

### Author contribution

420 LdR carried out the experiments and fieldwork and prepared the manuscript with contributions from all co-authors. HA contributed to the fieldwork and experiments and supervised the project. AG carried out the TEM experiments. DKD led the funding acquisition.

### Competing interests

The authors declare that they have no conflict of interest

### 425 Acknowledgements

This project has received funding from the European Union's Horizon 2020 research and innovation programme under grant agreement No 642976; and was supported by the Research Council of Norway through the Norwegian Centre for Transmission Electron Microscopy, NORTEM (197405/F50). We thank Ole Ivar Ulven for his assistance in the field, Berit Løken Berg for the help with the scanning electron microscope, Tarjei Bondevik for his lessons on focussed ion beam sample preparation,  
430 Joanna Dziadkowiec for the helpful discussions on interfacial processes and Andrew Putnis for his useful comments on the manuscript. The reviewers are thanked for their constructive comments that have helped to improve this manuscript.

### References

- Anderson, J. G., Doraiswamy, L. K., & Larson, M. A. (1998a). Microphase-assisted “autocatalysis” in a solid-liquid reaction with a precipitating product - I. Theory. *Chemical Engineering Science* 53, 2451–2458.
- 435 Anderson, J. G., Doraiswamy, L. K., & Larson, M. A. (1998b). Microphase-assisted “autocatalysis” in a solid-liquid reaction with a precipitating product - II. Experimental. *Chemical Engineering Science* 53, 2459–2468.
- Baldermann A., Mavromatis V., Frick P. M., Dietzel M. (2018) Effect of aqueous Si/Mg ratio and pH on the nucleation and growth of sepiolite at 25°C. *Geochim. Cosmochim. Acta* 227, 211–226.
- Beinlich A. and Austrheim H. (2012) In situ sequestration of atmospheric CO<sub>2</sub> at low temperature and surface cracking of  
440 serpentized peridotite in mine shafts. *Chem. Geol.* 332–333, 32–44.
- Bjørkum P. A. (1996) How important is pressure in causing dissolution of quartz in sandstones? *J. Sediment. Res.* 66, 147–154.



- Blum A. E., Yund R. A. and Lasaga A. C. (1990) The effect of dislocation density on the dissolution rate of quartz. *Geochim. Cosmochim. Acta* 54, 283–297.
- 445 Boulton G., Dobbie K. and Zatzepin S. (2001) Sediment deformation beneath glaciers and its coupling to the subglacial hydraulic system. *Quat. Int.* 86, 3–28.
- Brady P. V. and Walther J. V. (1990) Kinetics of quartz dissolution at low temperatures. *Chem. Geol.* 82, 253–264.
- Brantley S. L. (2005) Reaction Kinetics of Primary Rock-Forming Minerals under Ambient Conditions. In *Surface and Ground Water, Weathering, and Soils* (J.I. Drever, editor). Treatise on Geochemistry vol. 5 (H.D. Holland and K.K. Turekian, editors)
- 450 Elsevier-Pergamon, Oxford, UK.
- Brantley S. L., Crane S. R., Crerar D. A., Hellmann R. and Stallard R. (1986) Dissolution at dislocation etch pits in quartz. *Geochim. Cosmochim. Acta* 50, 2349–2361.
- Brew D. R. M. and Glasser F. P. (2005) Synthesis and characterisation of magnesium silicate hydrate gels. *Cem. Concr. Res.* 35, 85–98.
- 455 Casey W. H., Westrich H. R., Banfield J. F., Ferruzzi G. and Arnold G. W. (1993) Leaching and reconstruction at the surfaces of dissolving chain-silicate minerals. *Nature* 366, 253–256.
- Daval D., Sissmann O., Menguy N., Saldi G. D., Guyot F., Martinez I., Corvisier J., Garcia B., Machouk I., Knauss K. G. and Hellmann R. (2011) Influence of amorphous silica layer formation on the dissolution rate of olivine at 90°C and elevated pCO<sub>2</sub>. *Chem. Geol.* 284, 193–209.
- 460 de Meer S., Spiers C. J. and Nakashima S. (2005) Structure and diffusive properties of fluid-filled grain boundaries: An in-situ study using infrared (micro) spectroscopy. *Earth Planet. Sci. Lett.* 232, 403–414.
- de Ruyter L. and Austrheim H. (2018) Formation of magnesium silicate hydrate cement in nature. *J. Geol. Soc. London.* 175, 308–320.
- Dove P. M. and Nix C. J. (1997) The influence of the alkaline earth cations, magnesium, calcium, and barium on the dissolution
- 465 kinetics of quartz. *Geochim. Cosmochim. Acta* 61, 3329–3340.
- Evans D. J. A., Phillips E. R., Hiemstra J. F. and Auton C. A. (2006) Subglacial till: Formation, sedimentary characteristics and classification. *Earth-Science Rev.* 78, 115–176.
- Fisher Q. J., Knipe R. J. and Worden R. H. (2000) Microstructures of Deformed and Non-Deformed Sandstones from the North Sea: Implications for the Origins of Quartz Cement in Sandstones. In *Quartz cementation in sandstones* (eds. R.H. Worden, S. Morad), Special Publication of the International Association of Sedimentology 29, 129–146.
- 470 Gautier J. M., Oelkers E. H. and Schott J. (2001) Are quartz dissolution rates proportional to B.E.T. surface areas? *Geochim. Cosmochim. Acta* 65, 1059–1070.
- Gratz A. J., Manne S. and Hansma P. K. (1991) Atomic force microscopy of atomic-scale ledges and etch pits formed during dissolution of quartz. *Science.* 251, 1343–1346.
- 475 Greene G. W., Kristiansen K., Meyer E. E., Boles J. R. and Israelachvili J. N. (2009) Role of electrochemical reactions in pressure solution. *Geochim. Cosmochim. Acta* 73, 2862–2874.



- Gruber C., Zhu C., Georg R. B., Zakon Y. and Ganor J. (2014) Resolving the gap between laboratory and field rates of feldspar weathering. *Geochim. Cosmochim. Acta* 147, 90–106.
- Hellmann R., Penisson J. M., Hervig R. L., Thomassin J. H. and Abrioux M. F. (2003) An EFTEM/HRTEM high-resolution study of the near surface of labradorite feldspar altered at acid pH: Evidence for interfacial dissolution-reprecipitation. *Phys. Chem. Miner.* 30, 192–197.
- Hellmann R., Wirth R., Daval D., Barnes J. P., Penisson J. M., Tisserand D., Epicier T., Florin B. and Hervig R. L. (2012) Unifying natural and laboratory chemical weathering with interfacial dissolution-reprecipitation: A study based on the nanometer-scale chemistry of fluid-silicate interfaces. *Chem. Geol.* 294–295, 203–216.
- Hickman H. and Evans B. (1995) Kinetics of pressure solution at halite-silica interfaces and intergranular clay films. *J. Geophys. Res.* 100, 13,113-13,132.
- House W. A. and Orr D. R. (1992) Investigation of the pH Dependence of the Kinetics of Quartz Dissolution at 25°C. *J. Chem. Soc. Faraday Trans* 88, 233–241.
- Hövelmann J., Putnis C. V., Ruiz-Agudo E. and Austrheim H. (2012) Direct nanoscale observations of CO<sub>2</sub> sequestration during brucite [Mg(OH)<sub>2</sub>] dissolution. *Environ. Sci. Technol.* 46, 5253–5260.
- Iler R. K. (1979) *The Chemistry of Silica: Solubility, Polymerization, Colloid and Surface Properties, and Biochemistry.*, Wiley, New York.
- Imbabi M. S., Carrigan C. and McKenna S. (2012) Trends and developments in green cement and concrete technology. *Int. J. Sustain. Built Environ.* 1, 194–216.
- Jin F. and Al-Tabbaa A. (2014) Strength and hydration products of reactive MgO-silica pastes. *Cem. Concr. Compos.* 52, 27–33.
- Jonas L., John T., King H. E., Geisler T. and Putnis A. (2014) The role of grain boundaries and transient porosity in rocks as fluid pathways for reaction front propagation. *Earth Planet. Sci. Lett.* 386, 64–74.
- Jordan G., Higgins S. R., Eggleston C. M., Swapp S. M., Janney D. E. and Knauss K. G. (1999) Acidic dissolution of plagioclase: In-situ observations by hydrothermal atomic force microscopy. *Geochim. Cosmochim. Acta* 63, 3183–3191.
- Knauss K. G. and Wolery T. J. (1988) The dissolution kinetics of quartz as a function of pH and time at 70°C. *Geochim. Cosmochim. Acta* 52, 43–53.
- Kristiansen K., Valtiner M., Greene G. W., Boles J. R. and Israelachvili J. N. (2011) Pressure solution - The importance of the electrochemical surface potentials. *Geochim. Cosmochim. Acta* 75, 6882–6892.
- Lasaga A. C. (1984) Chemical kinetics of water-rock interactions. *J. Geophys. Res. Solid Earth* 89, 4009–4025.
- Lasaga A. C. and Luttge A. (2001) Variation of Crystal Dissolution Rate Based on a Dissolution Stepwave Model. *Science*. 291, 2400–2404.
- Meyer E. E., Greene G. W., Alcantar N. A., Israelachvili J. N. and Boles J. R. (2006) Experimental investigation of the dissolution of quartz by a muscovite mica surface: Implications for pressure solution. *J. Geophys. Res. Solid Earth* 111, 2–5.





- 510 Moore A. C. and Hultin I. (1980) Petrology, mineralogy, and origin of the Feragen ultramafic body, Sor-Trondelag, Norway. *Nor. Geol. Tidsskr.* 60, 235–254.
- Moore J., Lichtner P. C., White A. F. and Brantley S. L. (2012) Using a reactive transport model to elucidate differences between laboratory and field dissolution rates in regolith. *Geochim. Cosmochim. Acta* 93, 235–261.
- Nugent, M. A., Brantley S. L., Pantano C. G., Maurice P. A. (1998) The influence of natural mineral coatings on feldspar  
515 weathering. *Nature* 395, 588–591
- Parkhurst, B. D. L.; Appelo, C. a J. User's Guide To PHREEQC (Version 2) — a Computer Program for Speciation, and Inverse Geochemical Calculations. US Geol. Surv. - Water-Resources Investig. Reports 1999, 99–4259.
- Passchier C. W. and Trouw R. A. J. (2005) *Microtectonics*. Springer Science & Business Media.
- Piccini L. and Mecchia M. (2009) Solution weathering rate and origin of karst landforms and caves in the quartzite of Auyan-  
520 tepui (Gran Sabana, Venezuela). *Geomorphology* 106, 15–25.
- Pokrovsky O. S. and Schott J. (2004) Experimental study of brucite dissolution and precipitation in aqueous solutions: Surface speciation and chemical affinity control. *Geochim. Cosmochim. Acta* 68, 31–45.
- Pope G. A. (1995) Newly Discovered Submicron-Scale Weathering in Quartz: Geographical Implications. *Prof. Geogr.* 47, 375–387.
- 525 Proust D., Caillaud J. and Fontaine C. (2006) Clay minerals in early amphibole weathering: tri- to dioctahedral sequence as a function of crystallization sites in the amphibole. *Clays Clay Miner.* 54, 351–362.
- Renard F. and Ortoleva P. (1997) Water films at grain-grain contacts: Debye-Hückel, osmotic model of stress, salinity, and mineralogy dependence. *Geochim. Cosmochim. Acta* 61, 1963–1970.
- Rimstidt J. D. (2015) Rate equations for sodium catalyzed quartz dissolution. *Geochim. Cosmochim. Acta* 167, 195–204.
- 530 Roosz C., Grangeon S., Blanc P., Montouillout V., Lothenbach B., Henocq P., Giffaut E., Vieillard P. and Gaboreau S. (2015) Crystal structure of magnesium silicate hydrates (M-S-H): The relation with 2:1 Mg-Si phyllosilicates. *Cem. Concr. Res.* 73, 228–237.
- Ruiz-Agudo E., King H. E., Patiño-López L. D., Putnis C. V., Geisler T., Rodriguez-Navarro C. and Putnis A. (2016) Control of silicate weathering by interface-coupled dissolution-precipitation processes at the mineral-solution interface. *Geology* 44,  
535 567–570.
- Ruiz-Agudo E., Putnis C. V. and Putnis A. (2014) Coupled dissolution and precipitation at mineral–fluid interfaces. *Chem. Geol.* 383, 132–146.
- Ruiz-Agudo E., Putnis C. V., Rodriguez-Navarro C. and Putnis A. (2012) Mechanism of leached layer formation during chemical weathering of silicate minerals. *Geology* 40, 947–950.
- 540 Schaefer, J., Backus, E. H. G., & Bonn, M. (2018). Evidence for auto-catalytic mineral dissolution from surface-specific vibrational spectroscopy. *Nature Communications* 9, 1–6.
- Schwarz S. and Stöckhert B. (1996) Pressure solution in siliciclastic HP-LT metamorphic rocks constraints on the state of stress in deep levels of accretionary complexes. *Tectonophysics* 255, 203–209.



- Steeffel C. I., Van Cappellen P. (1990) A new kinetic approach to modeling water-rock interaction: The role of nucleation, precursors, and Ostwald ripening. *Geochim. Cosmochim. Acta* 54, 2657–2677.
- 545 Tosca N. J. and Masterson A. L. (2014) Chemical controls on incipient Mg-silicate crystallization at 25°C: Implications for early and late diagenesis. *Clay Miner.* 49.
- Tosca N. J. and Masterson A. L. (2014) Chemical controls on incipient Mg-silicate crystallization at 25°C: Implications for early and late diagenesis. *Clay Miner.* 49, 165–194.
- 550 Ulven O. I., Beinlich A., Hövelmann J., Austrheim H. and Jamtveit B. (2017) Subarctic physicochemical weathering of serpentinized peridotite. *Earth Planet. Sci. Lett.* 468, 11–26.
- Velbel M. A. and Barker W. W. (2008) Pyroxene weathering to smectite: Conventional and cryo-field emission scanning electron microscopy, Koua Bocca ultramafic complex, Ivory Coast. *Clays Clay Miner.* 56, 112–127.
- Walling S. A. and Provis J. L. (2016) Magnesia-Based Cements: A Journey of 150 Years, and Cements for the Future? *Chem. Rev.* 116, 4170–4204.
- 555 White A. F. and Brantley S. L. (2003) The effect of time on the weathering of silicate minerals: why do weathering rates differ in the laboratory and field? *Chem. Geol.* 202, 479–506.
- White A. F., Bullen T. D., Schulz M. S., Blum A. E., Huntington T. G. and Peters N. E. (2001) Differential rates of feldspar weathering in granitic regoliths. *Geochim. Cosmochim. Acta* 65, 847–869.
- 560 Wray R. A. L. and Sauro F. (2017) An updated global review of solutional weathering processes and forms in quartz sandstones and quartzites. *Earth-Science Rev.* 171, 520–557.
- Yanina S. V., Rosso K. M. and Meakin P. (2006) Defect distribution and dissolution morphologies on low-index surfaces of quartz. *Geochim. Cosmochim. Acta* 70, 1113–1127.
- Zhang T., Cheeseman C. R. and Vandeperre L. J. (2011) Development of low pH cement systems forming magnesium silicate hydrate (M-S-H). *Cem. Concr. Res.* 41, 439–442.
- 565 Zhang T., Vandeperre L. J. and Cheeseman C. R. (2012) Magnesium-silicate-hydrate cements for encapsulating problematic aluminium containing wastes. *J. Sustain. Cem. Mater.* 1, 34–45.
- Zhang T., Zou J., Wang B., Wu Z., Jia Y. and Vandeperre C. R. (2018) Microstructure Characterization of Magnesium Silicate Hydrate Phase. *Materials (Basel)*. 11, 1–15.
- 570 Zhu C., Veblen D. R., Blum A. E. and Chipera S. J. (2006) Naturally weathered feldspar surfaces in the Navajo Sandstone aquifer, Black Mesa, Arizona: Electron microscopic characterization. *Geochim. Cosmochim. Acta* 70, 4600–4616.

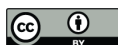

## Figures

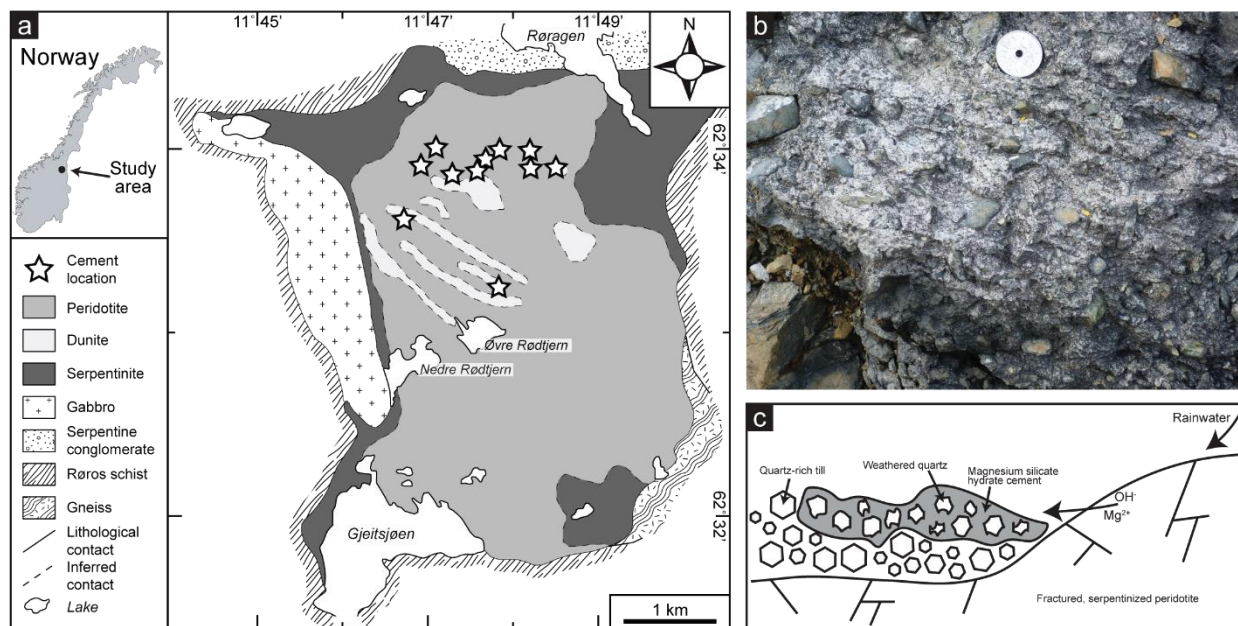

575

**Fig. 1. (a) Simplified geological map of the Feragen Ultramafic Body (after Moore and Hultin, 1980; Beinlich and Austrheim, 2012; De Ruiter and Austrheim, 2018). Note that felsic till is present on top of the bedrock. (b) Field photo of the cemented rock that occurs at multiple localities in the area consisting of magnesium silicate hydrate cement and quartz-rich grains. (c) Schematic, not to scale, overview of the formation of the cemented rock, showing that rain water becomes high in pH and rich in Mg as it reacts with the ultramafic rocks that contain brucite and subsequently leads to the dissolution of quartz from the quartz-rich till and the precipitation of magnesium silicate hydrate cement at the outer layer of the till.**

580

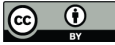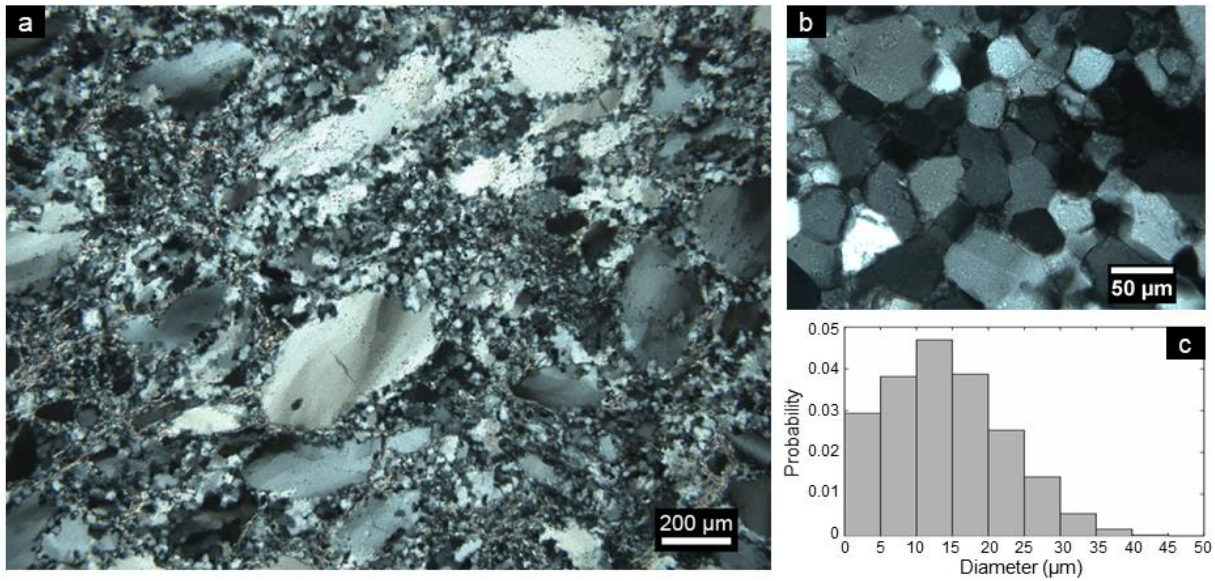

585 **Fig. 2.** (a) Optical micrograph with cross polarized light of recrystallized quartz from Feragen, as indicated by the presence of small equigranular polygonal new grains with straight grain boundaries together with large old grains with undulose extinction. This sample has not been weathered or cemented. (b) Zoomed-in view of the polygonal grains. (c) Probability density histogram of the grain size of single quartz grains, obtained from cemented rocks (n=1730).

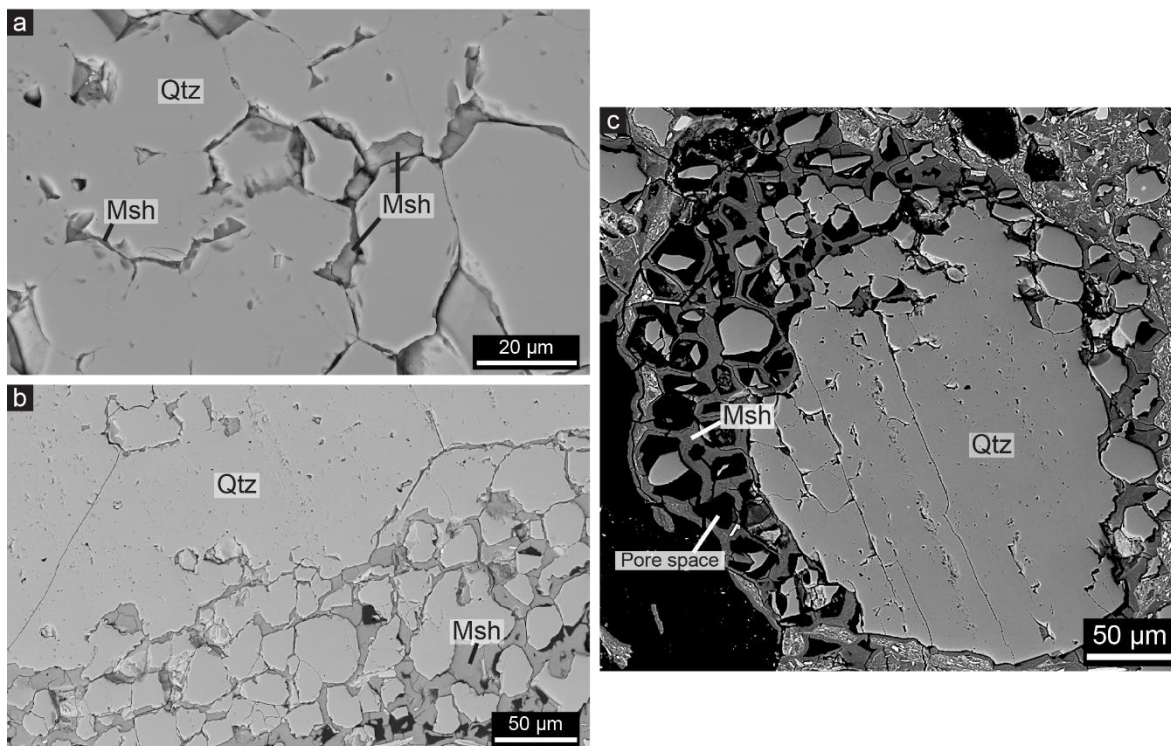

590

595

**Fig. 3.** BSE images of the relation between quartz (Qtz) and magnesium silicate hydrate (Msh) cement. (a) Cement is present at the grain boundaries within a quartz fragment. Note the hexagonal shape typical for recrystallized quartz. (b) Disintegrated quartz grains with cement between them at the outer boundary (lower right) of a large, mm-sized, grain, while the inner part (upper left) is mainly intact. (c) A quartz fragment that is disintegrated into small grains surrounded by cement on the outer boundary, of which some are dissolved and left behind pore spaces (black) in the shape of the grains. Note that while the left side of the fragment indicates dissolution of disintegrated quartz grains, the right part indicates only disintegration and the middle and bottom part indicate the original grain.

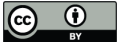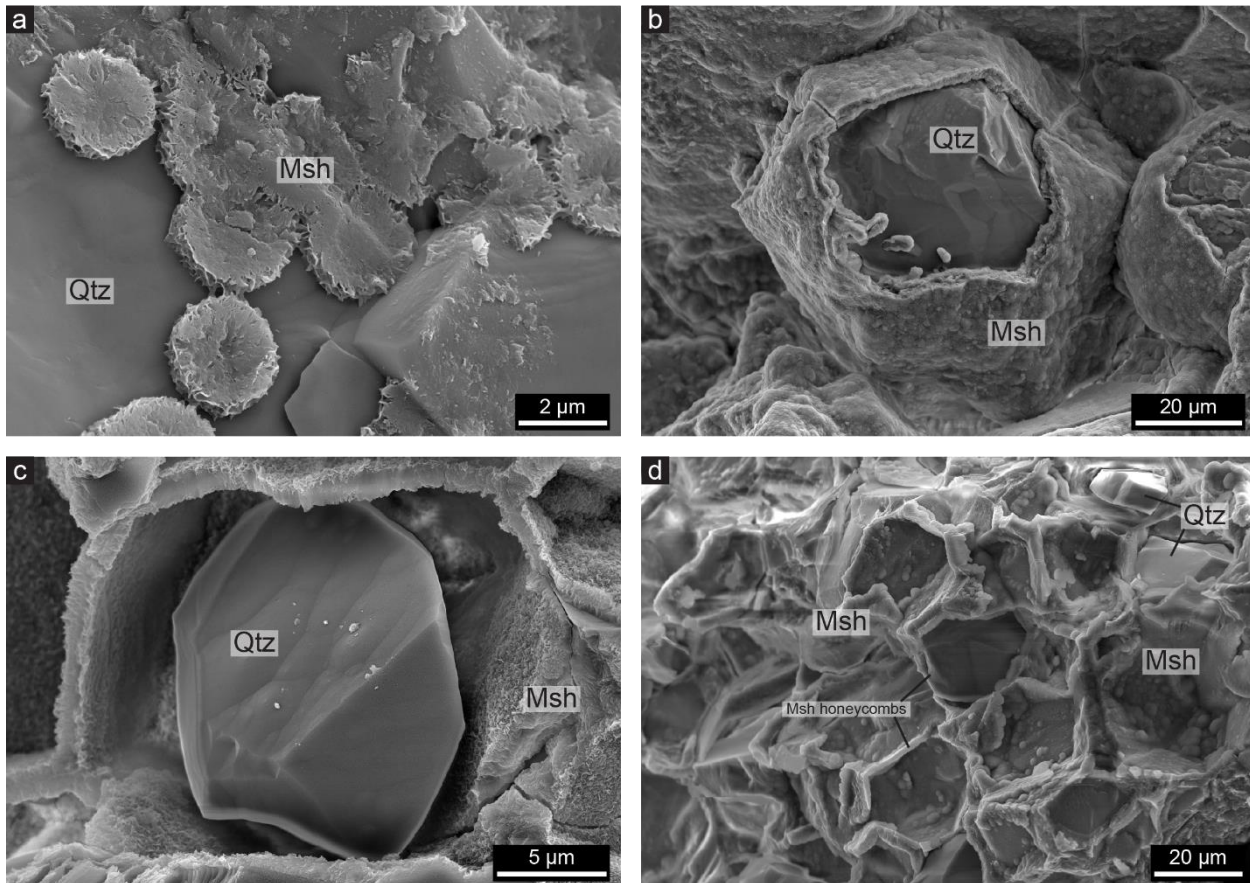

600 Fig. 4. SE images of quartz (Qtz) with a magnesium silicate hydrate (Msh) coating. (a) At initial stages of cement precipitation, it  
forms in disc shapes on the quartz surfaces. As the cement forms on the quartz surface, it takes over the topography of the grains,  
605 giving the cement a smooth outer surface but a flaky inner texture. (b) A hexagonal quartz grain almost completely covered with  
cement. (c) A quartz grain started to dissolve after the cement has been precipitated, leading to a void between the quartz and the  
cement layer. (d) Quartz grains are completely dissolved and a network of mostly empty pore spaces in the shape of honeycombs is  
produced.

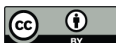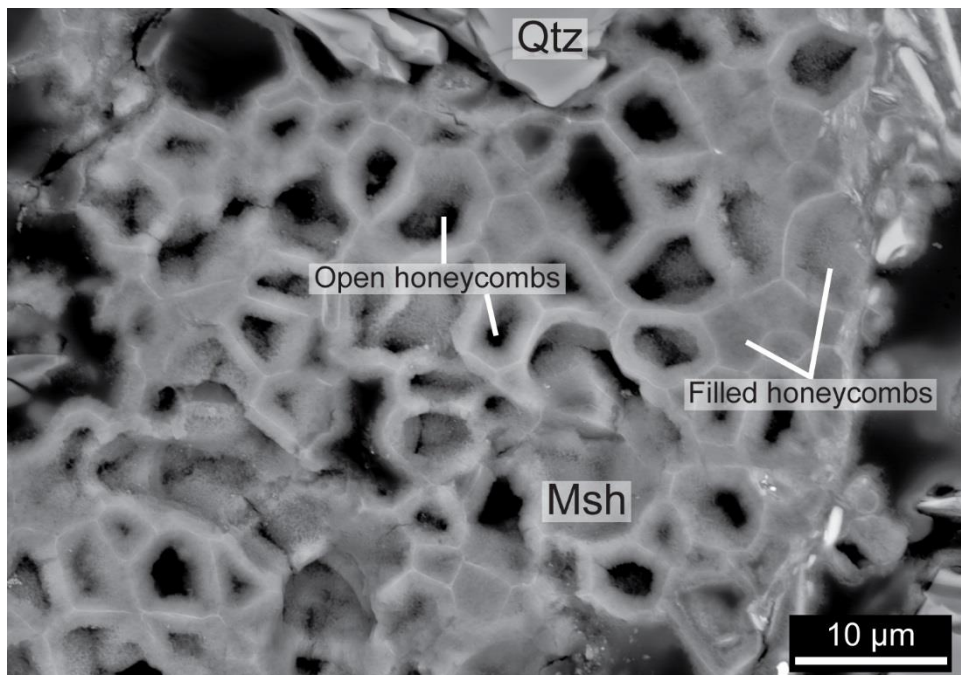

610 Fig. 5. Honeycomb texture with typical 2-10  $\mu\text{m}$  diameter pore spaces. The texture consists of magnesium silicate hydrate cement (Msh) and the interior is either empty (black) or filled with cement (grey) with a different contrast, signifying a different density. The size of the individual honeycomb cells does not seem to correlate with the cell being filled or not. No quartz (Qtz) is present, except for at the top of the figure.

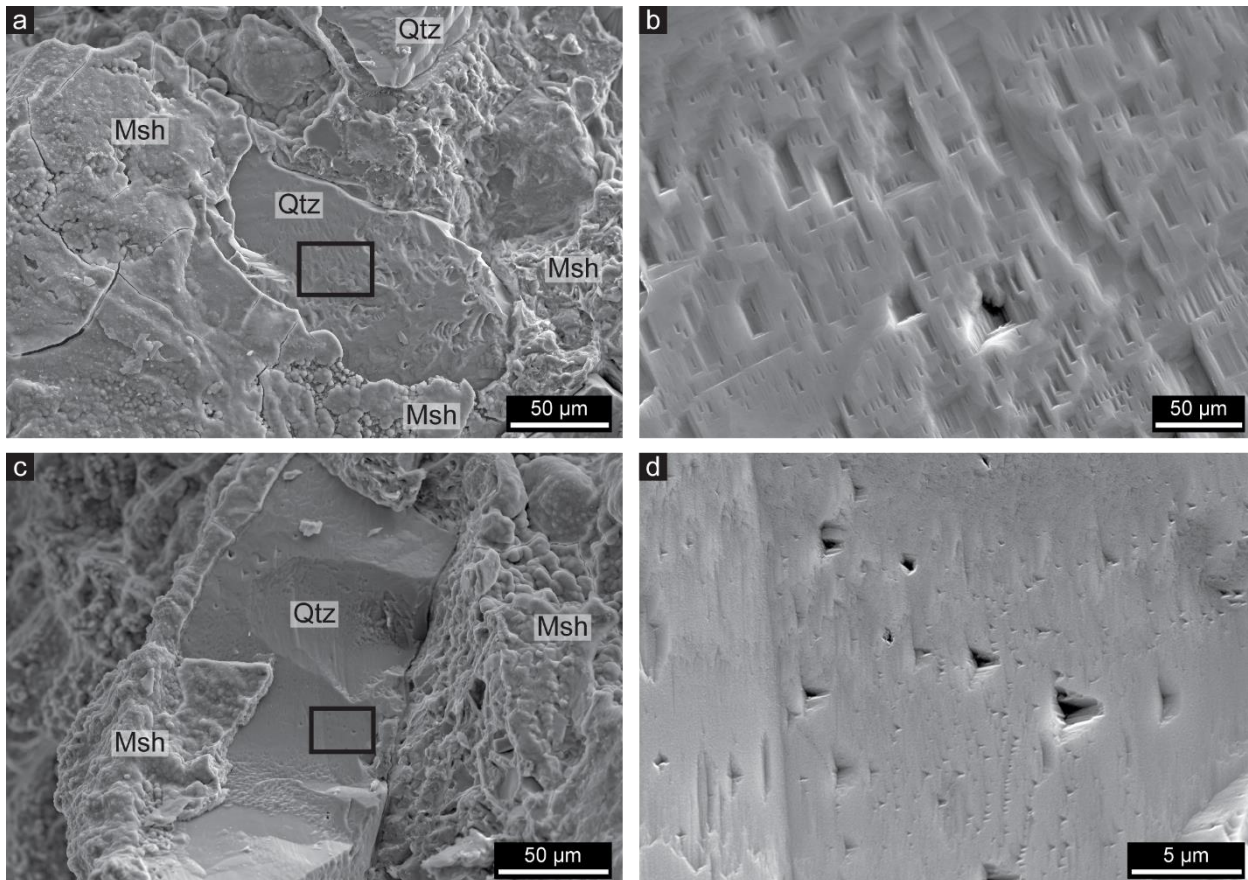

615 **Fig. 6.** SE images from SEM, showing etch pits on quartz (Qtz) grains that are embedded in magnesium silicate hydrate cement (Msh). (a) A quartz grain with rectangular etch pits on the surface, the box indicates the location of (b). (b) Rectangular etch pit of varied sizes, note that all have the same orientation and that some are aligned. The dislocation density is  $10^{10} \text{ cm}^{-2}$ . (c) A quartz grain with triangular etch pits on the surface, the box indicates the location of (d). (d) Triangular etch pits on a quartz surface that vary in size but have an identical orientation, note that some of the smaller etch pits are aligned.



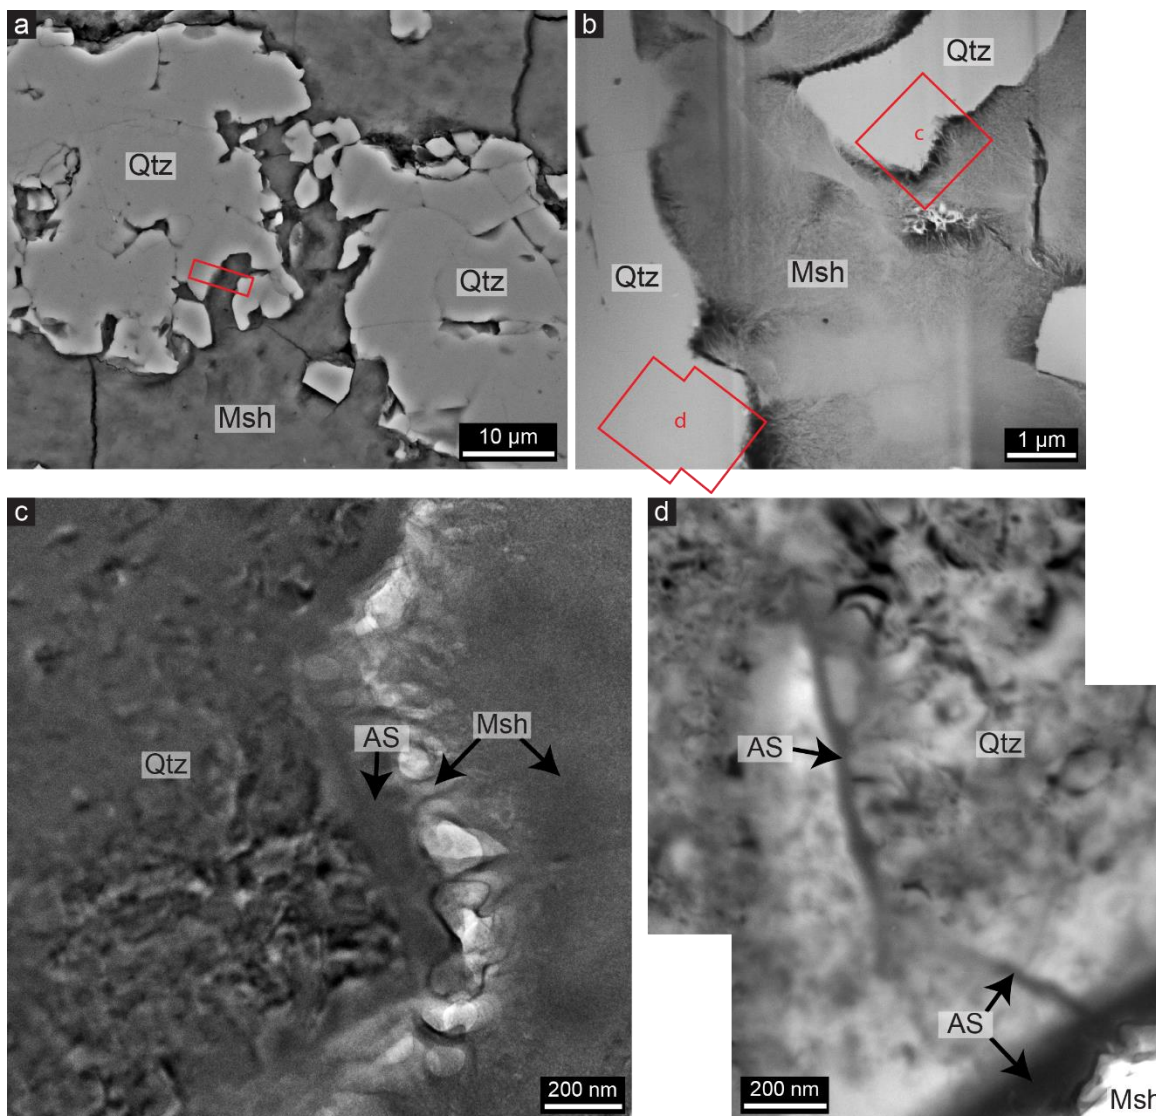

620

625

630

**Fig. 7.** (a) SEM image of weathered quartz (Qtz) surrounded by magnesium silicate hydrate (Msh), where the rectangle indicates the location of the FIB thin film studied with TEM. (b) STEM image giving an overview of the FIB thin film, showing the locations of c and d and the presence of quartz within the fibrous cement. (c) Bright field TEM image showing that an amorphous silica (AS) layer of 100-200 nm is present around crystalline quartz that is surrounded by magnesium silicate hydrate cement. Note the presence of fringes indicating crystallinity in the quartz grain and the lack of those in the amorphous silica layer. The fibrous magnesium silicate hydrate is attached to the amorphous silica although pore spaces (the bright areas) are present in between. (d) Bright field TEM image showing that a layer of amorphous silica of 30 nm is present between two quartz grains and starts at the thicker amorphous layer on the outer boundary of quartz (lower right) where magnesium silicate hydrate is present, like the layer in (c), and follows the grain boundary for about 1.4  $\mu\text{m}$  inwards after which it disappears.
